# Supplementary material
Source: PubMed Central journal article supplement (PMC5470369)
Supplement: jamainternmed-177-624-s002.pdf [file jamainternmed-177-624-s002.pdf]

## Supplementary Online Content

Choudhry NK, Krumme AA, Ercole PM, et al. Effect of reminder devices on medication adherence: the REMIND randomized clinical trial. *JAMA Int Med*. Published online February 27, 2017. doi:10.1001/jamainternmed.2016.9627

**eFigure 1.** Three Low-Cost Reminder Devices

**eFigure 2.** Trial Timeline

**eTable 1.** Oral Maintenance Medications

**eTable 2.** Odds Ratio of Optimal Adherence by Study Arm, Adjusted for Correlation Within Employer Using Generalized Estimating Equation Results

**eTable 3.** Percent Difference in Mean MPR by Study Arm

This supplementary material has been provided by the authors to give readers additional information about their work.

**eFigure 1.** Three Low-Cost Reminder Devices

Pill bottle strip with toggles (Panel A); Pill bottle cap with digital timer (Panel B); Standard pillbox (Panel C)

A

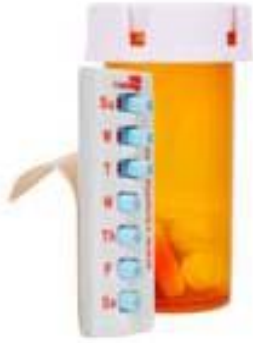

B

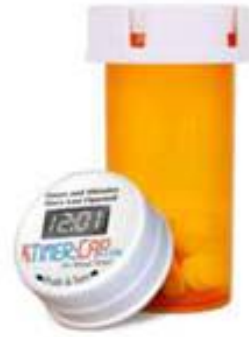

C

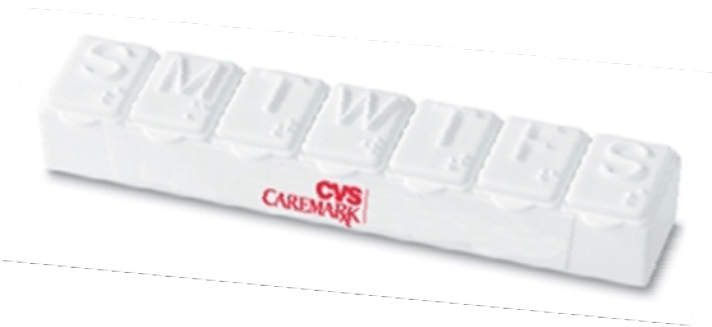

**eFigure 2.** Trial timeline

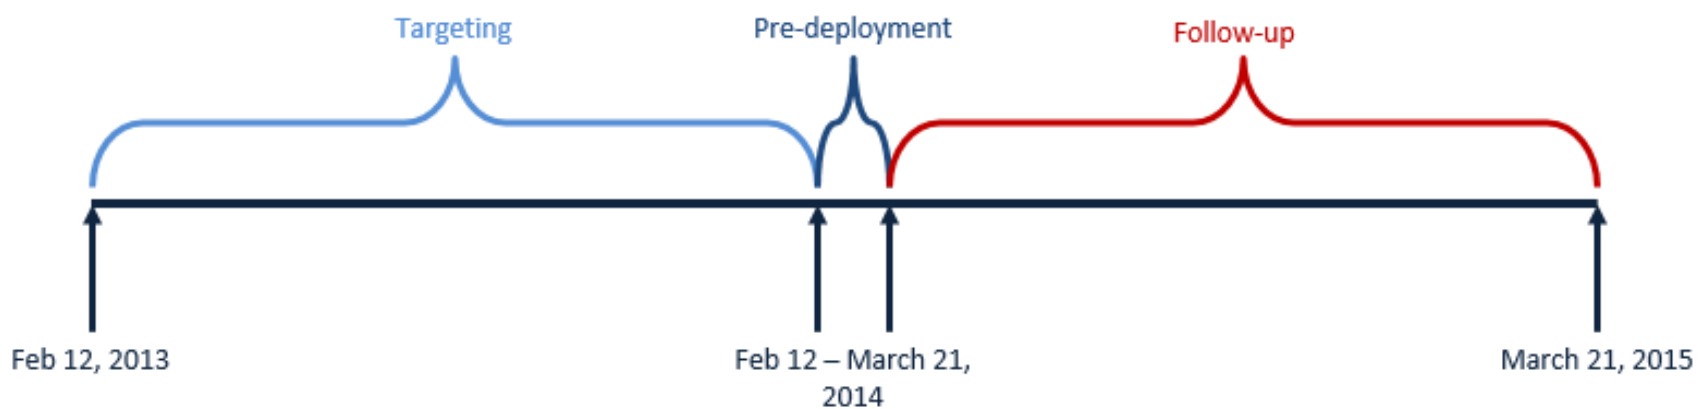

**eTable 1.** Oral maintenance medications

| Maintenance medication for the treatment of chronic disease | Medication classes                       |
|-------------------------------------------------------------|------------------------------------------|
| <b><i>Cardiovascular</i></b>                                |                                          |
| High cholesterol                                            | Statin and statin combinations           |
|                                                             | Bile acid sequestrants                   |
|                                                             | Fibrates                                 |
|                                                             | Nicotinic acid derivatives               |
| Coronary artery disease                                     | Isosorbide                               |
|                                                             | Ranolazine                               |
|                                                             | Platelet inhibitors                      |
| Diabetes                                                    | Amylin analogs                           |
|                                                             | GLP-1 receptor agonists                  |
|                                                             | Sulfonylureas                            |
|                                                             | Biguanides                               |
|                                                             | Meglitinide analogs                      |
|                                                             | Alpha-glucosidase inhibitors             |
|                                                             | DPP-4 inhibitors                         |
| Thiazolidinediones                                          |                                          |
| Heart failure                                               | Cardiac glycoside                        |
|                                                             | Selective aldosterone receptor agonists  |
|                                                             | Nitrate and vasodilator combinations     |
|                                                             | Spironolactone                           |
|                                                             | Diuretics                                |
| Hypertension                                                | Angiotensin-converting enzyme inhibitors |
|                                                             | Angiotensin II receptor blockers         |
|                                                             | Direct renin inhibitors                  |
|                                                             | Anti-adrenergic antihypertensives        |
|                                                             | Beta-blockers                            |
|                                                             | Diuretics                                |
|                                                             | Calcium-channel blockers                 |
| <b><i>Non-cardiovascular</i></b>                            |                                          |
| Breast cancer                                               | Tamoxifen                                |
|                                                             | Aromatase inhibitors                     |
|                                                             | Toremifene                               |
| Benign prostatic hypertrophy                                | Alpha-blockers                           |
|                                                             | Finasteride                              |
|                                                             | Combination BPH agents                   |
| Schizophrenia, bipolar disorder, anxiety                    | Antipsychotics – atypical                |
|                                                             | Antianxiety medications                  |
| Arrhythmia                                                  | Antiarrhythmics                          |

|                                                    |                                                  |
|----------------------------------------------------|--------------------------------------------------|
| Parkinson's disease                                | Carbidopa – Levodopa combination                 |
|                                                    | COMT inhibitors                                  |
|                                                    | Monoamine oxidase inhibitors                     |
|                                                    | Carbidopa                                        |
| Seizure or epilepsy                                | Anticonvulsants                                  |
| <b>Additional maintenance medication condition</b> | <b>Medication classes</b>                        |
| Depression                                         | Alpha-2 receptor antagonists                     |
|                                                    | Monoamine oxidase inhibitors                     |
|                                                    | Modified cyclics                                 |
|                                                    | Tricyclic agents                                 |
|                                                    | Selective serotonin reuptake inhibitors          |
|                                                    | Serotonin and norepinephrine reuptake inhibitors |
|                                                    | Thienbenzodiazepine and SSRI combination         |

**eTable 2.** Odds ratio of optimal adherence by study arm, adjusted for correlation within employer using generalized estimating equation results

| Outcome                                                                                     | Versus control    |                   |                   | Head-to-head                  |                               |                                         |
|---------------------------------------------------------------------------------------------|-------------------|-------------------|-------------------|-------------------------------|-------------------------------|-----------------------------------------|
|                                                                                             | Pillbox           | Digital timer cap | Pill bottle strip | Pillbox vs. Digital timer cap | Pillbox vs. Pill bottle strip | Digital timer cap vs. Pill bottle strip |
| <i>Primary</i> All CVD and non-depression maintenance medications (Chronic Disease stratum) | 1.04 (0.95, 1.14) | 1.00 (0.87, 1.16) | 0.94 (0.88, 1.00) | 1.00 (0.93, 1.14)             | 1.10 (0.98, 1.24)             | 1.05 (0.96, 1.15)                       |
| <i>Secondary 1</i> All CVD medications                                                      | 1.03 (0.94, 1.13) | 1.01 (0.88, 1.16) | 0.95 (0.89, 1.02) | 1.02 (0.91, 1.14)             | 1.08 (0.95, 1.24)             | 1.04 (0.96, 1.13)                       |
| <i>Secondary 2</i> Antidepressants (Antidepressant stratum)                                 | 1.02 (0.87, 1.19) | 0.96 (0.82, 1.13) | 0.93 (0.78, 1.11) | 1.06 (0.96, 1.17)             | 1.13 (1.06, 1.22)             | 1.03 (0.92, 1.16)                       |

**eTable 3.** Percent difference in mean MPR by study arm

| Outcome                                                           | Versus control      |                     |                     | Head-to-head                  |                               |                                         |
|-------------------------------------------------------------------|---------------------|---------------------|---------------------|-------------------------------|-------------------------------|-----------------------------------------|
|                                                                   | Pillbox             | Digital timer cap   | Pill bottle strip   | Pillbox vs. Digital timer cap | Pillbox vs. Pill bottle strip | Digital timer cap vs. Pill bottle strip |
| <i>Primary</i> All CVD and non-depression maintenance medications | 0.49 (-0.52, 1.50)  | 0.24 (-0.77, 1.24)  | 0.62 (-1.32, 1.10)  | 0.25 (-0.57, 1.08)            | 0.47 (-0.69, 1.62)            | 0.44 (-0.71, 1.59)                      |
| <i>Secondary 1</i> All CVD medications                            | 0.24 (-0.87, 1.34)  | 0.37 (-0.73, 1.47)  | 0.07 (-1.22, 1.35)  | -0.14 (-1.04, 0.77)           | 0.20 (-1.00, 1.41)            | 0.22 (-0.98, 1.42)                      |
| <i>Secondary 2</i> Antidepressants                                | -0.13 (-1.70, 1.43) | -0.79 (-2.36, 0.78) | -1.14 (-3.00, 0.73) | 0.66 (-0.62, 1.93)            | 0.86 (-0.91, 2.64)            | 0.59 (-1.18, 2.35)                      |

\*Absolute change in MPR  
x100
